# Supplementary material for: Enabled cellulose nanopaper with outstanding water stability and wet strength via activated residual lignin as a reinforcement
Source: Royal Society of Chemistry journal article supplement (doi:10.1039/d1gc03906g), 2021-01-01
Supplement: d1gc03906g1.pdf [file d1gc03906g1.pdf]

## Supplementary Information

# Enabled Cellulose Nanopaper with Outstanding Water Stability and Wet Strength via Activated Residual Lignin as a Reinforcement

Jinlong Wang,<sup>a,b</sup> Wei Chen,<sup>a,b</sup> Tengteng Dong,<sup>a,b</sup> Haiqi Wang,<sup>a,b</sup> Shurun Si,<sup>a,b</sup> and Xusheng

Li<sup>\*a,b</sup>

a. School of Light Industry and Food Engineering, Guangxi University, 530004 Nanning, P.R.

China

b. Guangxi Key Laboratory of Clean Pulp & Papermaking and Pollution Control, 530004

Nanning, P.R. China

\* Corresponding author at: School of Light Industrial and Food Engineering, Guangxi

University, Nanning, Guangxi, 530004, China. E-mail address: [lixusheng@gxu.edu.cn](mailto:lixusheng@gxu.edu.cn).

### **Supplementary Note S1. Circulating reaction system for nitric acid solutions.**

The bamboo powder was pretreated with  $\text{HNO}_3$  and  $\text{H}_2\text{O}_2$  for 24 h, and other experimental conditions were consistent with the description in the Experimental Section. After treatment, the mixture was filtered to produce a cellulose-rich solid and a filtrate containing  $\text{HNO}_3$ . The concentrations of  $\text{HNO}_3$  and  $\text{H}_2\text{O}_2$  in the filtrate were tested. The concentration of  $\text{HNO}_3$  was determined by titration with 1.000 mol/L NaOH standard solution, and the concentration of  $\text{H}_2\text{O}_2$  was determined by titration with 0.100 mol/L potassium permanganate standard solution. The concentrations of  $\text{HNO}_3$  and  $\text{H}_2\text{O}_2$  present during cycles of the process are shown in Table S4. The initial concentrations of  $\text{HNO}_3$  and  $\text{H}_2\text{O}_2$  were 2.75 mol/L and 1.03 mol/L, respectively. After the first reaction, the concentrations of  $\text{HNO}_3$  and  $\text{H}_2\text{O}_2$  in the filtrate were 2.73 mol/L and 0.82 mol/L, respectively. During the treatment, only a small amount of  $\text{HNO}_3$  was consumed, which is consistent with previous studies.<sup>1</sup> Each treatment consumed approximately 20% of the  $\text{H}_2\text{O}_2$ . In summary, to ensure normal operation of the cyclic reaction system, only approximately 0.01 mol/g  $\text{H}_2\text{O}_2$  must be added after every cycle, and approximately 0.006 mol/g  $\text{HNO}_3$  must be added after every five cycles.

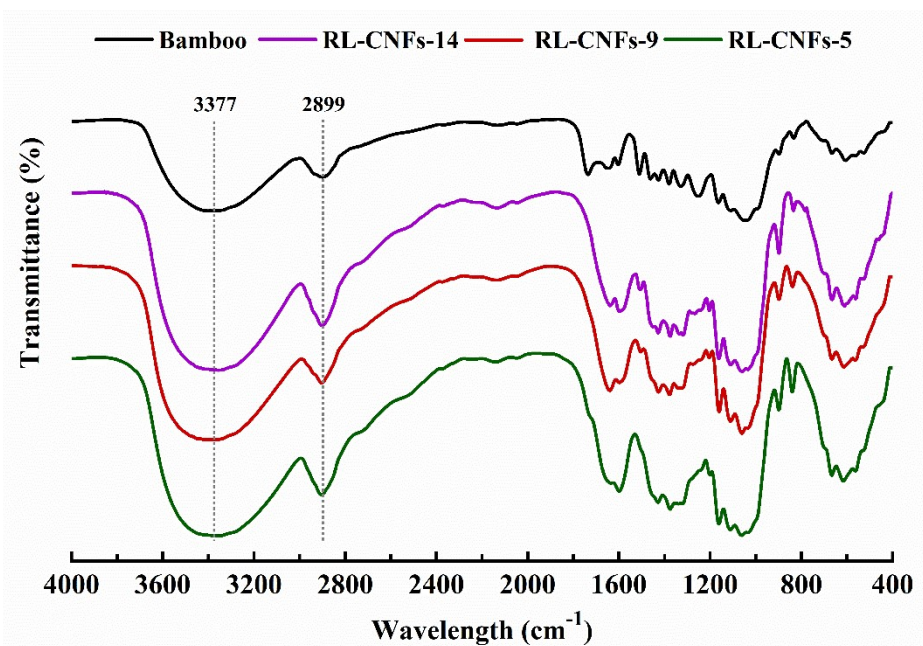

Fig. S1 FTIR spectra of bamboo and RL-CNFs (4000-400  $\text{cm}^{-1}$ ).

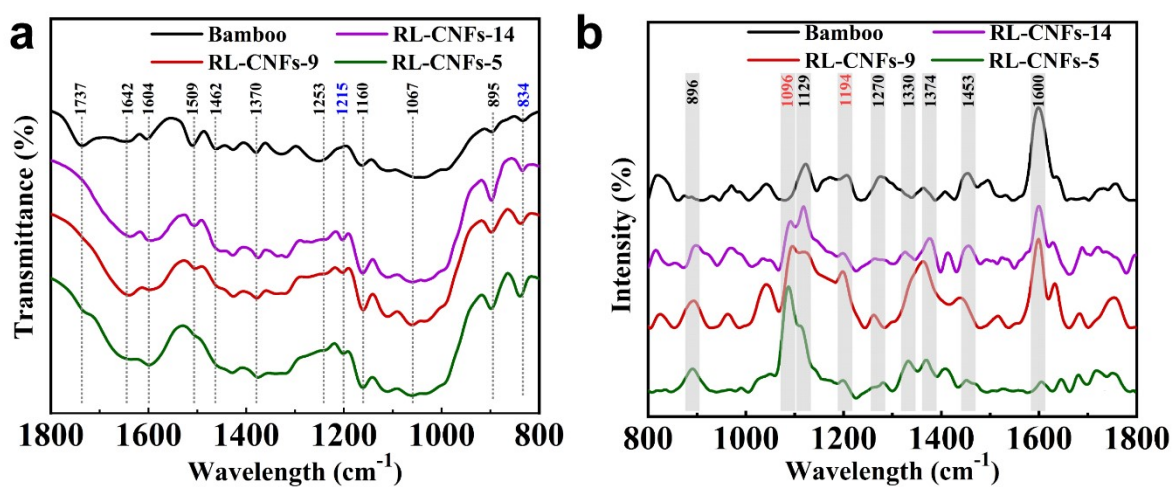

Figure. S2 (a) FTIR spectra of bamboo and RL-CNFs (1800-800  $\text{cm}^{-1}$ ); (b) Raman pattern of bamboo and RL-CNFs.

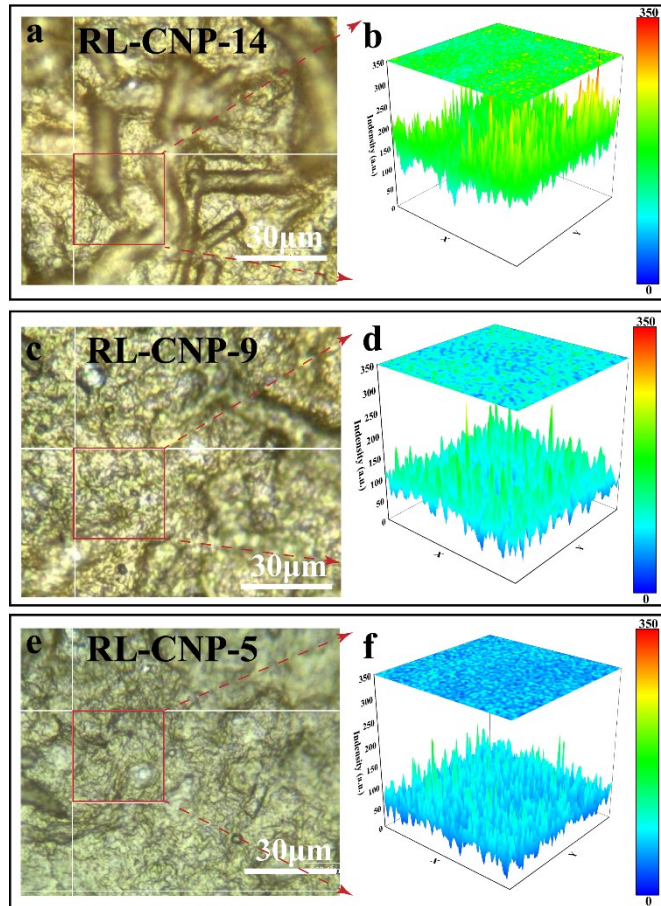

**Fig. S3** Raman electron microscope image of ARL-CNP and the Raman mapping image of the location: (a) (b) RL-CNP-14, (c) (d) RL-CNP-9 and (e) (f) RL-CNP-5.

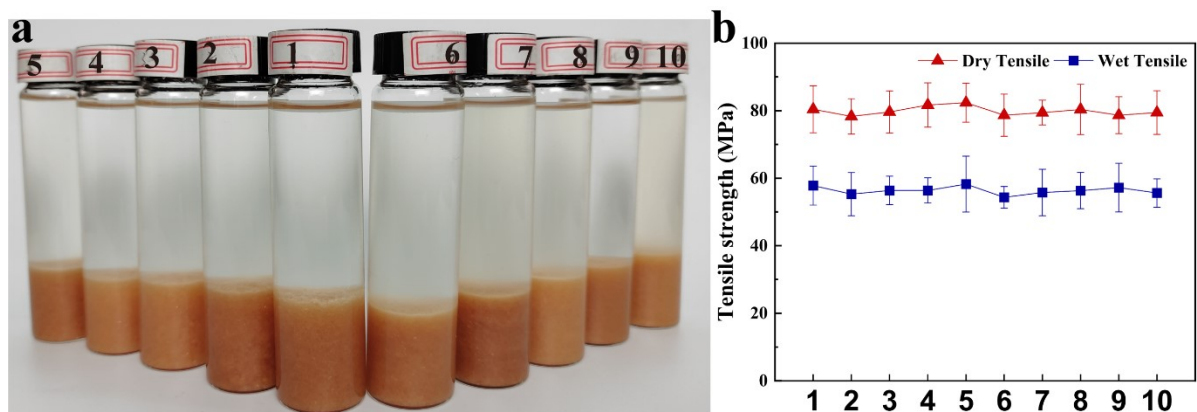

**Fig. S4** Cellulose-rich fiber solution after 10 cycles of the nitric acid solution circulation reaction system (a); wet and dry tensile strengths of RL-CNP (b).

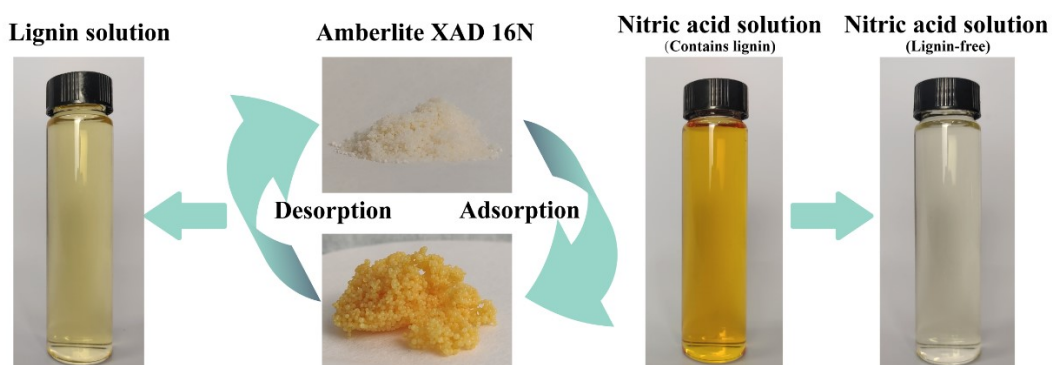

**Fig. S5** Amberlite XAD16N adsorbs lignin in  $\text{HNO}_3$ .

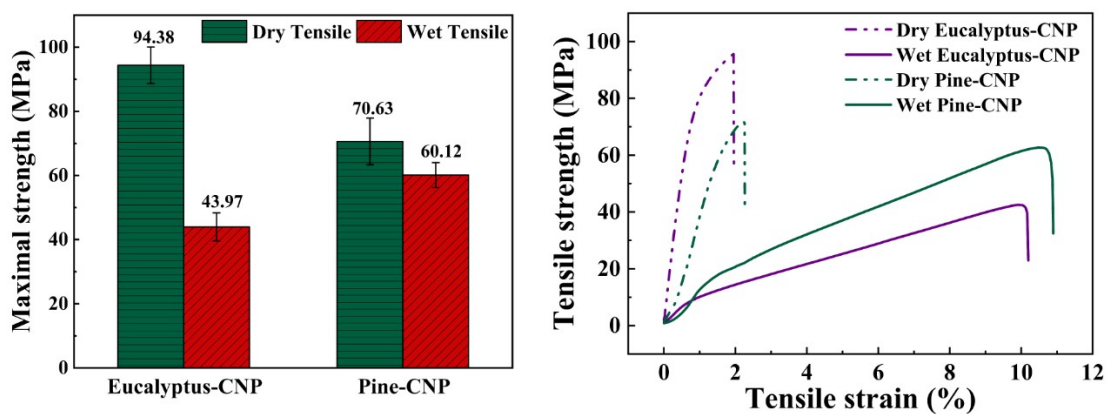

**Fig. S6** Diagram of dry and wet tensile strengths for Eucalyptus-CNPs (with 11.18% lignin content) and Pine-CNPs (with 14.36% lignin content): (a) histograms; (b) graphs.

**Table S1.** Distribution of functional groups of bamboo and ARL-CNFs in FTIR spectrum.<sup>2-4</sup>

| Wavenumber (cm <sup>-1</sup> ) | Assignment                                                                                                                                                    | Attributed               |
|--------------------------------|---------------------------------------------------------------------------------------------------------------------------------------------------------------|--------------------------|
| 3377                           | O–H stretching                                                                                                                                                | Cellulose                |
| 2899                           | C–H stretching                                                                                                                                                | Cellulose                |
| 1737                           | C-O carbonyl band, C=O stretching vibrations of the acetyl groups of galactoglucomannan, carboxyl- and aldehydes and aromatic/conjugated aldehydes and esters | Lignin and hemicellulose |
| 1642                           | O-H bending vibrations                                                                                                                                        | Cellulose                |
| 1604                           | Aromatic skeleton vibration                                                                                                                                   | Lignin                   |
| 1509                           | C=C stretching vibration in aromatic ring                                                                                                                     | Lignin                   |
| 1462                           | Aromatic ring C-H deformation                                                                                                                                 | Lignin                   |
| 1370                           | C-H bending, -CH <sub>3</sub> (lignin), -CH <sub>2</sub> (carbohydrates), lignin-carbohydrate complexes bonds                                                 | Lignin and carbohydrate  |
| 1253                           | C-O Stretching vibration                                                                                                                                      | Hemicellulose            |
| 1215                           | C-O of phenol <sup>5</sup>                                                                                                                                    | Lignin                   |
| 1160                           | C–O stretching                                                                                                                                                | Cellulose                |
| 1067                           | C-O-C pyranose ring skeletal vibration                                                                                                                        | Cellulose                |
| 895                            | β-glycosidic bond                                                                                                                                             | Cellulose                |
| 834                            | O-H of phenolic hydroxyl                                                                                                                                      | Lignin                   |

**Table S2.** Distribution of the functional groups of bamboo fiber and ARL-CNFs in the Raman spectrum<sup>6</sup>.

| Wavenumber (cm <sup>-1</sup> ) | Assignment                                                                                            | Attributed              |
|--------------------------------|-------------------------------------------------------------------------------------------------------|-------------------------|
| 896                            | H-C-C and H-C-O bending at C6 <sup>7, 8</sup>                                                         | Cellulose               |
| 1096                           | C-C-O stretch of phenol <sup>7-10</sup>                                                               | Lignin                  |
| 1129                           | Coniferaldehyde/sinapaldehyde <sup>7-10</sup>                                                         | Lignin                  |
| 1194                           | A phenol mode <sup>7, 9</sup>                                                                         | Lignin                  |
| 1270                           | Aryl-O-CH <sub>3</sub> and aryl-O of aryl-OH; guaiacyl/syringyl ring (with C=O group) <sup>8, 9</sup> | Lignin                  |
| 1330                           | Aliphatic O-H bend <sup>7-11</sup>                                                                    | Cellulose               |
| 1374                           | C-H bend in R <sub>3</sub> C-H <sup>9</sup>                                                           | Cellulose               |
| 1453                           | CH <sub>3</sub> bending in OCH <sub>3</sub> <sup>7-10</sup>                                           | Lignin and carbohydrate |
| 1600                           | Aryl ring stretch, symmetric <sup>7-10</sup>                                                          | Lignin                  |

**Table S3.** Summary of published main results on wet tensile strength of CNF materials.

| Ref.             | Sample                                       | Wet tensile strength (MPa) | Methods and Characteristics                                                                                                                          |
|------------------|----------------------------------------------|----------------------------|------------------------------------------------------------------------------------------------------------------------------------------------------|
| <b>This work</b> | LF-CNF                                       | 4.12 ± 1.54                | Retained with lignin-carbohydrate complex<br>Solvent: water<br>High yield (60.88%) based on biomass                                                  |
|                  | ARL-CNF with 5% lignin                       | 41.46 ± 4.22               |                                                                                                                                                      |
|                  | ARL-CNF with 14% lignin                      | 68.91 ± 3.50               |                                                                                                                                                      |
| 12               | NFC                                          | 3.1±0.1                    | Carboxymethylated and cross-linked with glycidyltrimethylammonium chloride (GTMA)<br>Post-treatment process                                          |
|                  | NFC/CMC+(10%) GTMA                           | 36±9                       |                                                                                                                                                      |
|                  | NFC/CMC+(15%) GTMA                           | 42±13                      |                                                                                                                                                      |
| 13               | OCNF- aldehydes                              | ~12                        | Oxidized by sodium periodate and then grafted with aldehydes<br>Post-treatment process                                                               |
| 14               | CNF                                          | 1.2±0.1                    | Grafted with hydrophobic alkyl<br>Post-treatment process<br><br>esterificated with acetic, butyric, hexanoic and 2 dodecen-1-yl-succinnic anhydrides |
|                  | CNF-2 (acetic)                               | 2.8±0.2                    |                                                                                                                                                      |
|                  | CNF-4 (butyric)                              | 1.8±0.1                    |                                                                                                                                                      |
|                  | CNF-6 (hexanoic)                             | 2.1±0.1                    |                                                                                                                                                      |
|                  | CNF-16 (2 dodecen-1-yl-succinnic anhydrides) | 4.4±0.8                    |                                                                                                                                                      |
| 15               | Unmodified CNP                               | 2.3±1.53                   | Cross-linked by citric acid and sodium hypophosphate<br>Post-treatment process                                                                       |
|                  | Crosslinked CNP                              | 13.7±6.28                  |                                                                                                                                                      |
| 16               | TCNF-(10%) 88PVA                             | 29.7 ± 4.7                 | TEMPO/NaClO <sub>2</sub> -oxidized and bonded with poly (vinyl alcohol) (PVA)<br>Post-treatment process                                              |
|                  | TCNF-(25%)88PVA                              | 21.5 ± 2.5                 |                                                                                                                                                      |
|                  | TCNF-(10%)98PVA                              | 33.4 ± 6.0                 |                                                                                                                                                      |
|                  | TCNF-(25%)98PVA                              | 22.9 ± 5.5                 |                                                                                                                                                      |
| 17               | CNF                                          | 11± 2                      | Grafted or bonded with aromatic mono-epoxy (phenylglycidylether, PGE)<br>Post-treatment process                                                      |
|                  | CNF-bonded-PGE                               | 9± 1                       |                                                                                                                                                      |
|                  | CNF-grafted-PGE                              | 70±4                       |                                                                                                                                                      |
| 18               | CNF                                          | 18.0 ± 0.5                 | Residual free lignin particles were dispersed using organic solvents<br>Solvent: dimethylacetamide (DMAC)                                            |
|                  | CNF with 6% lignin                           | 17.6±4.2                   |                                                                                                                                                      |
|                  | CNF with 10% lignin                          | 19.8±1.3                   |                                                                                                                                                      |
|                  | CNF with 12% lignin                          | 44.3 ± 2.3                 |                                                                                                                                                      |
| 19               | CNF-Alginate                                 | ~17                        | Entangled with the algal polysaccharides alginate<br>Post-treatment process                                                                          |
| 20               | CNF                                          | 2.8 ± 0.3                  | Dispersed with vitrimer nanoparticles<br>Post-treatment process                                                                                      |
|                  | CNF <sub>65</sub> /VP <sub>35</sub>          | 31 ± 5                     |                                                                                                                                                      |
|                  | CNF <sub>50</sub> /VP <sub>50</sub>          | 22 ± 1                     |                                                                                                                                                      |
| 21               | CNF                                          | 0.9±0.1                    | Grafted with gelatin<br>Post-treatment process                                                                                                       |
|                  | CNF-gelatin                                  | 33.0 ± 2.3                 |                                                                                                                                                      |
| 22               | CNF with 5% lignin                           | <5                         | Retained lignin                                                                                                                                      |
|                  | CNF with 21% lignin                          | <10                        |                                                                                                                                                      |

**Table S4.** Concentrations and amounts used for supplementation of HNO<sub>3</sub> and H<sub>2</sub>O<sub>2</sub> levels in the nitric acid solution circulation reaction system.

| Times | HNO <sub>3</sub><br>concentration<br>mol/L | H <sub>2</sub> O <sub>2</sub><br>concentration<br>mol/L | H <sub>2</sub> O <sub>2</sub><br>supplementation<br>mol/g | HNO <sub>3</sub><br>supplementation<br>mol/g |
|-------|--------------------------------------------|---------------------------------------------------------|-----------------------------------------------------------|----------------------------------------------|
| 0     | 2.75                                       | 1.03                                                    |                                                           |                                              |
| 1     | 2.73                                       | 0.82                                                    | 0.0097                                                    |                                              |
| 2     | 2.70                                       | 0.76                                                    | 0.0125                                                    |                                              |
| 3     | 2.67                                       | 0.73                                                    | 0.0138                                                    |                                              |
| 4     | 2.67                                       | 0.76                                                    | 0.0125                                                    |                                              |
| 5     | 2.63                                       | 0.77                                                    | 0.0120                                                    | 0.0055                                       |
| 6     | 2.76                                       | 0.75                                                    | 0.0129                                                    |                                              |
| 7     | 2.72                                       | 0.76                                                    | 0.0125                                                    |                                              |
| 8     | 2.68                                       | 0.80                                                    | 0.0106                                                    |                                              |
| 9     | 2.64                                       | 0.78                                                    | 0.0115                                                    |                                              |
| 10    | 2.59                                       | 0.75                                                    | 0.0129                                                    |                                              |



## REFERENCES

1. J. Wang, X. Li, J. Song, K. Wu, Y. Xue, Y. Wu and S. J. N. Wang, 2020, **10**, 943.
2. B. Deepa, E. Abraham, N. Cordeiro, M. Mozetic, A. P. Mathew, K. Oksman, M. Faria, S. Thomas and L. A. Pothan, *Cellulose*, 2015, **22**, 1075-1090.
3. M. Sain and S. Panthapulakkal, *Ind Crop Prod*, 2006, **23**, 1-8.
4. X. Song, Y. Jiang, X. Rong, W. Wei, S. Wang and S. Nie, *Bioresource Technology*, 2016, **216**, 1098-1101.
5. J. I. Morán, V. A. Alvarez, V. P. Cyras and A. Vázquez, *Cellulose*, 2008, **15**, 149-159.
6. Ö. Özgenç, S. Durmaz, I. H. Boyaci and H. Eksi-Kocak, *Spectrochimica Acta Part A: Molecular and Biomolecular Spectroscopy*, 2017, **171**, 395-400.
7. C.-M. Popescu and M.-C. Popescu, *Spectrochimica Acta Part A: Molecular and Biomolecular Spectroscopy*, 2013, **115**, 227-233.
8. S. Yamauchi, Y. Iijima and S. Doi, *Journal of Wood Science*, 2005, **51**, 498-506.
9. S. Yamauchi and Y. Kurimoto, *Journal of wood science*, 2003, **49**, 235-240.
10. E. Windeisen, C. Strobel and G. Wegener, *Wood science and technology*, 2007, **41**, 523-536.
11. O. Faix, in *Methods in lignin chemistry*, Springer, 1992, pp. 83-109.
12. N. Pahimanolis, A. Salminen, P. A. Penttilä, J. T. Korhonen, L.-S. Johansson, J. Ruokolainen, R. Serimaa and J. Seppälä, *Cellulose*, 2013, **20**, 1459-1468.
13. P. A. Larsson, L. A. Berglund and L. Wågberg, *Cellulose*, 2014, **21**, 323-333.
14. H. Sehaqui, T. Zimmermann and P. Tingaut, *Cellulose*, 2014, **21**, 367-382.
15. A. Quellmalz and A. Mihranyan, *ACS Biomaterials Science & Engineering*, 2015, **1**, 271-276.
16. M. Hakalahti, A. Salminen, J. Seppälä, T. Tammelin and T. Hänninen, *Carbohydrate polymers*, 2015, **126**, 78-82.
17. F. Ansari, E. L. Lindh, I. Furo, M. K. Johansson and L. A. Berglund, *Composites Science and Technology*, 2016, **134**, 175-183.
18. Q. Wang, H. Du, F. Zhang, Y. Zhang, M. Wu, G. Yu, C. Liu, B. Li and H. Peng, *Journal of Materials Chemistry A*, 2018, **6**, 13021-13030.
19. T. Bensselfelt, J. Engström and L. Wågberg, *Green Chemistry*, 2018, **20**, 2558-2570.
20. F. Lossada, J. Guo, D. Jiao, S. Groeer, E. Bourgeat-Lami, D. Montarnal and A. Walther, *Biomacromolecules*, 2018, **20**, 1045-1055.
21. K. Kriechbaum and L. Bergström, *Biomacromolecules*, 2020, **21**, 1720-1728.
22. S. S. Nair and N. Yan, *Cellulose*, 2015, **22**, 3137-3150.
